# Supplementary material for: Expression Levels of GHRH-Receptor, pAkt and Hsp90 Predict 10-Year Overall Survival in Patients with Locally Advanced Rectal Cancer
Source: MDPI journal article supplement (doi:10.3390/biomedicines11030719), 2023-02-27
Supplement: s1 [file s1]

***Supplementary Table S1: The relationship between pre-treatment proteins, clinical parameters and OS using the log-rank test***

|                  |                                          | Mean <sup>a</sup> |            |
|------------------|------------------------------------------|-------------------|------------|
|                  |                                          | Estimate          | Std. Error |
| <b>GHRH-R</b>    | Low intensity                            | 112.556           | 4.154      |
|                  | High intensity                           | 75.781            | 4.325      |
|                  | Log-rank (Mantel-Cox) <b>Sig.: 0.000</b> |                   |            |
| <b>Hsp90</b>     | Low intensity                            | 104.722           | 4.372      |
|                  | High intensity                           | 79.644            | 4.639      |
|                  | Log-rank (Mantel-Cox) <b>Sig.: 0.004</b> |                   |            |
| <b>p-Akt</b>     | Low intensity                            | 113.077           | 2.828      |
|                  | High intensity                           | 80.048            | 4.304      |
|                  | Log-rank (Mantel-Cox) <b>Sig.: 0.001</b> |                   |            |
| <b>SOUL</b>      | Low intensity                            | 86.237            | 6.098      |
|                  | High intensity                           | 88.563            | 4.460      |
|                  | Log-rank (Mantel-Cox) Sig.: 0,661        |                   |            |
| <b>HSP 16.2</b>  | Low intensity                            | 89.920            | 4.831      |
|                  | High intensity                           | 85.655            | 5.308      |
|                  | Log-rank (Mantel-Cox) Sig.: 0,975        |                   |            |
| <b>Responses</b> | TRG(3,4,5)                               | 80.351            | 5.199      |
|                  | TRG(1,2)                                 | 95.280            | 4,849      |
|                  | Log-rank (Mantel-Cox) <b>Sig.: 0.029</b> |                   |            |
|                  | upper                                    | 100.063           | 4.599      |

|                           |                                          |        |       |
|---------------------------|------------------------------------------|--------|-------|
| <b>Tumor localization</b> | middle                                   | 75.256 | 5.957 |
|                           | lower                                    | 92.529 | 6.899 |
|                           | Log Rank (Mantel-Cox) Sig.: <b>0.015</b> |        |       |
| <b>Gender</b>             | male                                     | 82.255 | 4.921 |
|                           | female                                   | 93.704 | 5.165 |
|                           | Log Rank (Mantel-Cox) Sig.: 0.057        |        |       |
| <b>Time to surgery</b>    | <= 7 week                                | 88.508 | 4.888 |
|                           | > 7 week                                 | 85.636 | 5.450 |
|                           | Log Rank (Mantel-Cox) Sig.: 0.568        |        |       |

<sup>a</sup> Estimation is limited to the largest survival time if it is censored

**Supplementary material to the following manuscript:**

**Expression levels of GHRH-Receptor, pAkt and Hsp90 predict 10-year overall survival in patients with locally advanced rectal cancer**
